# Supplementary material for: Transcription regulation of African swine fever virus: dual role of M1249L
Source: PubMed Central journal article supplement — Nat Commun. 2024 Nov 20;15:10058. doi: 10.1038/s41467-024-54461-1 (PMC11579359; doi:10.1038/s41467-024-54461-1), 2024-11-20
Supplement: 41467_2024_54461_MOESM1_ESM.pdf [file 41467_2024_54461_MOESM1_ESM.pdf]

## Supplementary Information

### **Transcription regulation of African swine fever virus: dual role of M1249L**

Dongming Zhao, Nan Wang, Xiaoying Feng, Zhenjiang Zhang, Kongen Xu, Tao Zheng, Yunge Yang, Xuemei Li, Xianjin Ou, Rui Zhao, Zihe Rao, Zhigao Bu, Yutao Chen, Xiangxi Wang

Corresponding author: raozh@ibp.ac.cn; buzhighao@caas.cn; chenyt tao@ibp.ac.cn;  
xiangxi@ibp.ac.cn

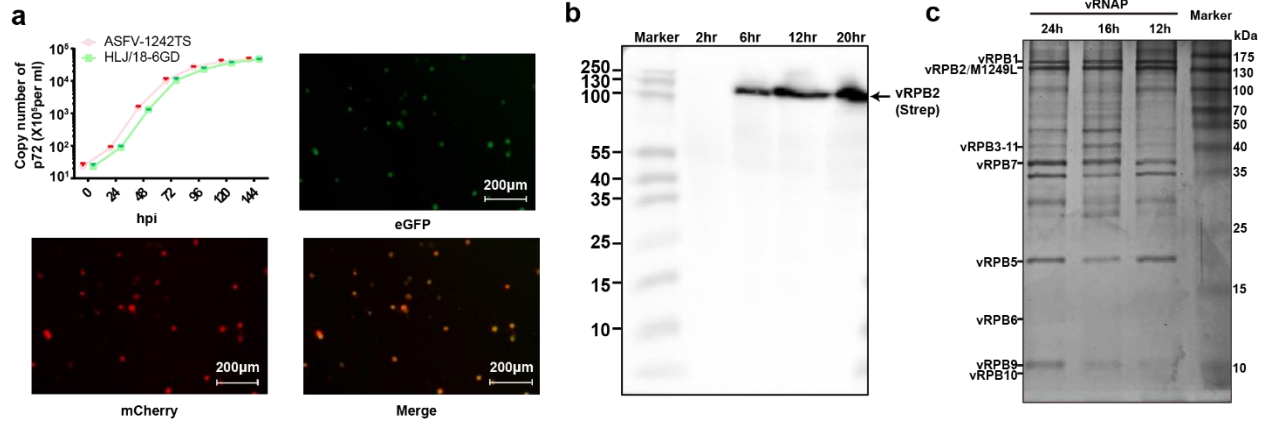

**Supplementary Figure 1: Purification and Activity of ASFV vRNAP-M1249L Complexes.**

(a) Replication of ASFV-1242TS in comparison to its parental virus HLJ/18-6GD. Virus titer was determined for the indicated time points from infected cells and cell culture supernatant, respectively. Fluorescence of eGFP and mCherry indicate the recombinant virus construct is successfully accomplished. (b) Western blot analysis for monitoring protein expression at different time points. (c) Proteins eluted from XT beads at different time points visualized by silver staining on a 12.5% SDS-PAGE.

**a**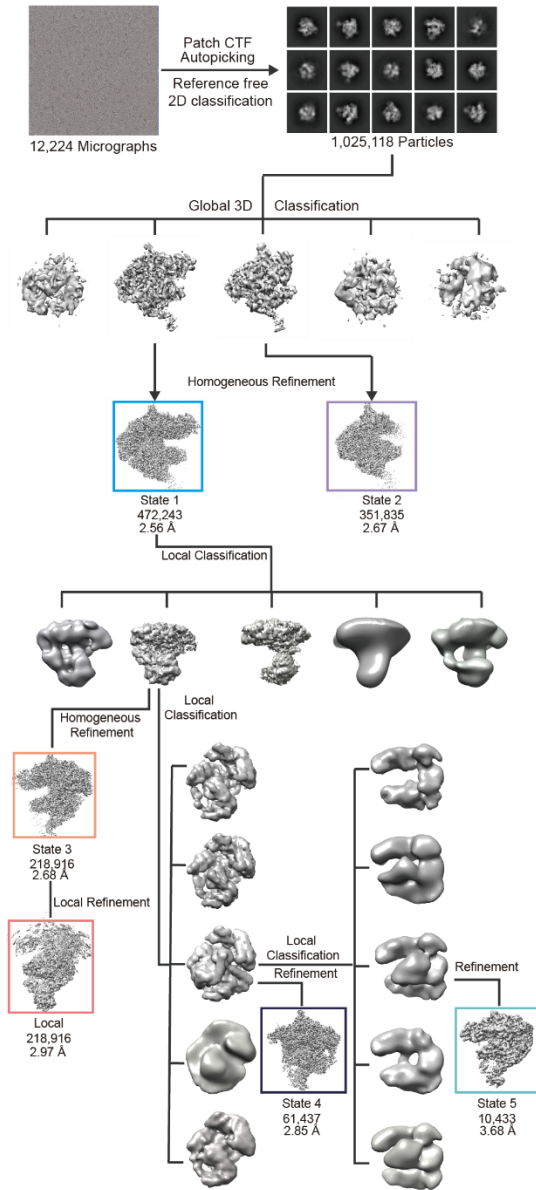**b**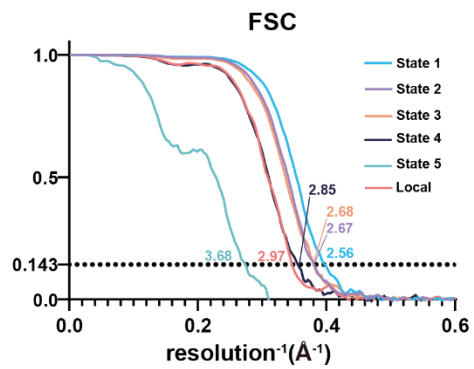**c**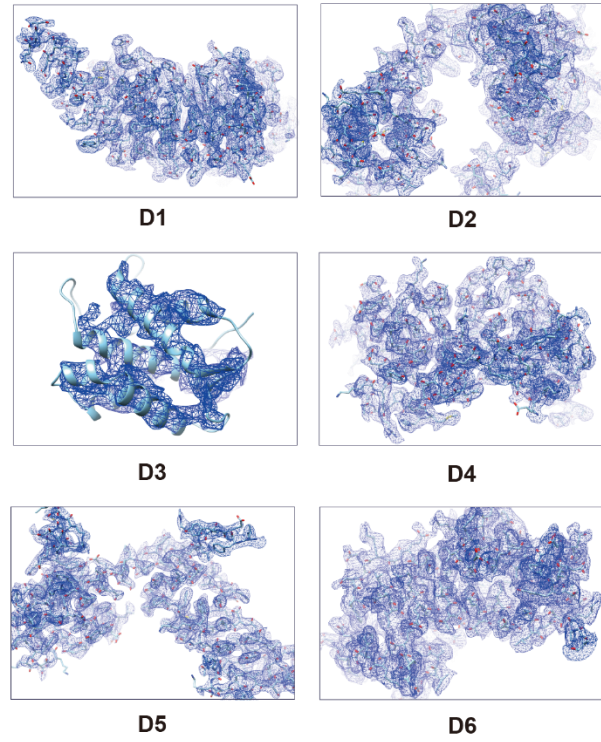**d**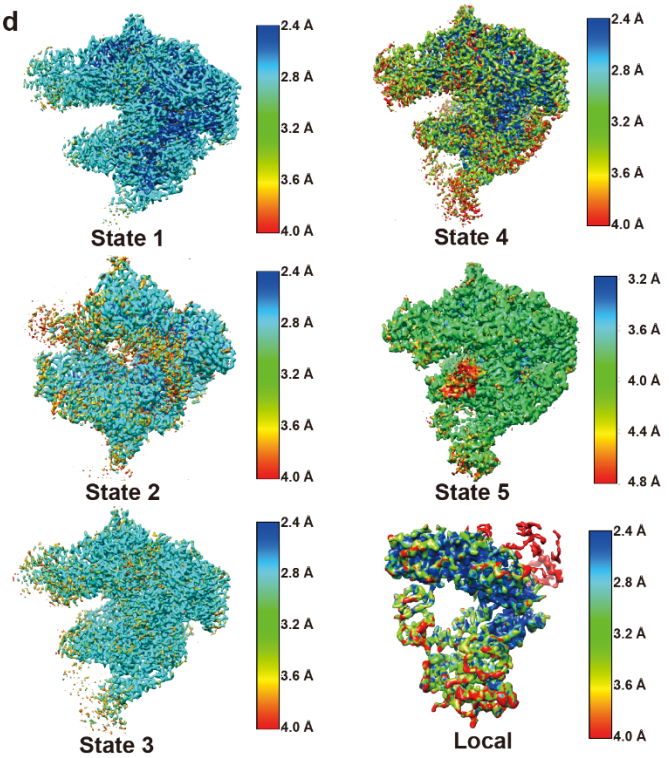

**Supplementary Figure 2: Structure Determination of ASFV vRNAP-M1249L Complex. (a)**

Follow chart of image processing. State 1 (PDB: 8YQT, EMD-39505), state 2 (PDB: 8YQV, EMD-39507), state 3 (PDB: 8YQW, EMD-39508), state 4 (PDB: 8YQU, EMD-39506), state 5 (PDB: 8YQY, EMD-39510), local (PDB: 8YQW, EMD-39508). **(b)** FSC plots for consensus refinement. **(c)** Representative density of ASFV M1249L reconstruction. **(d)** Local resolution mapped to the reconstruction density isosurface.

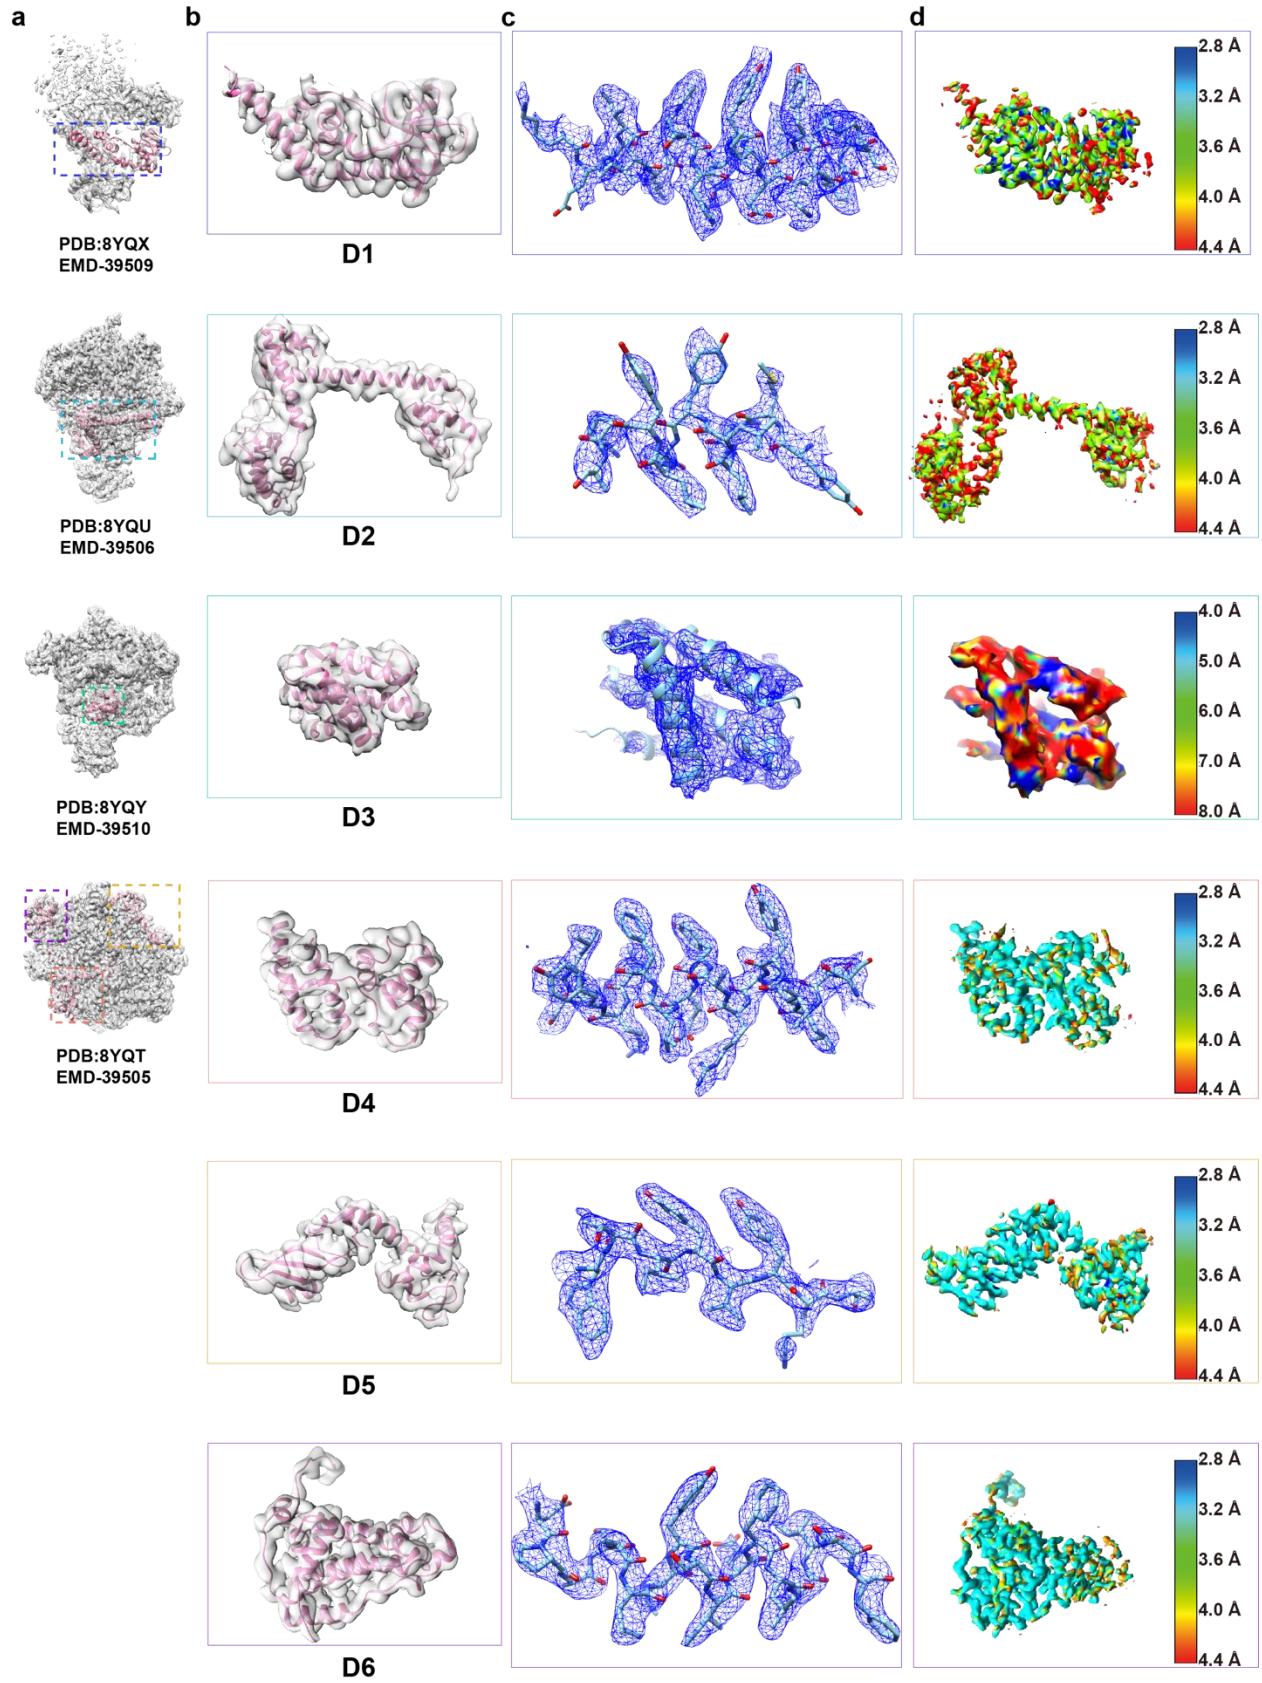

**Supplementary Figure 3: Density maps and atomic models of ASFV M1249L.**(a) Maps used for the reconstruction of various domains of M1249L and the reconstructed pdbs. The cartoon representation of the reconstructed domains of M1249L is displayed in pink and outlined with a dashed box. (b) Electron density maps of ASFV M1249L are shown overlaid with the corresponding model. (c) Representative density of ASFV M1249L reconstruction. (d) Local resolution mapped to the reconstruction density isosurface.

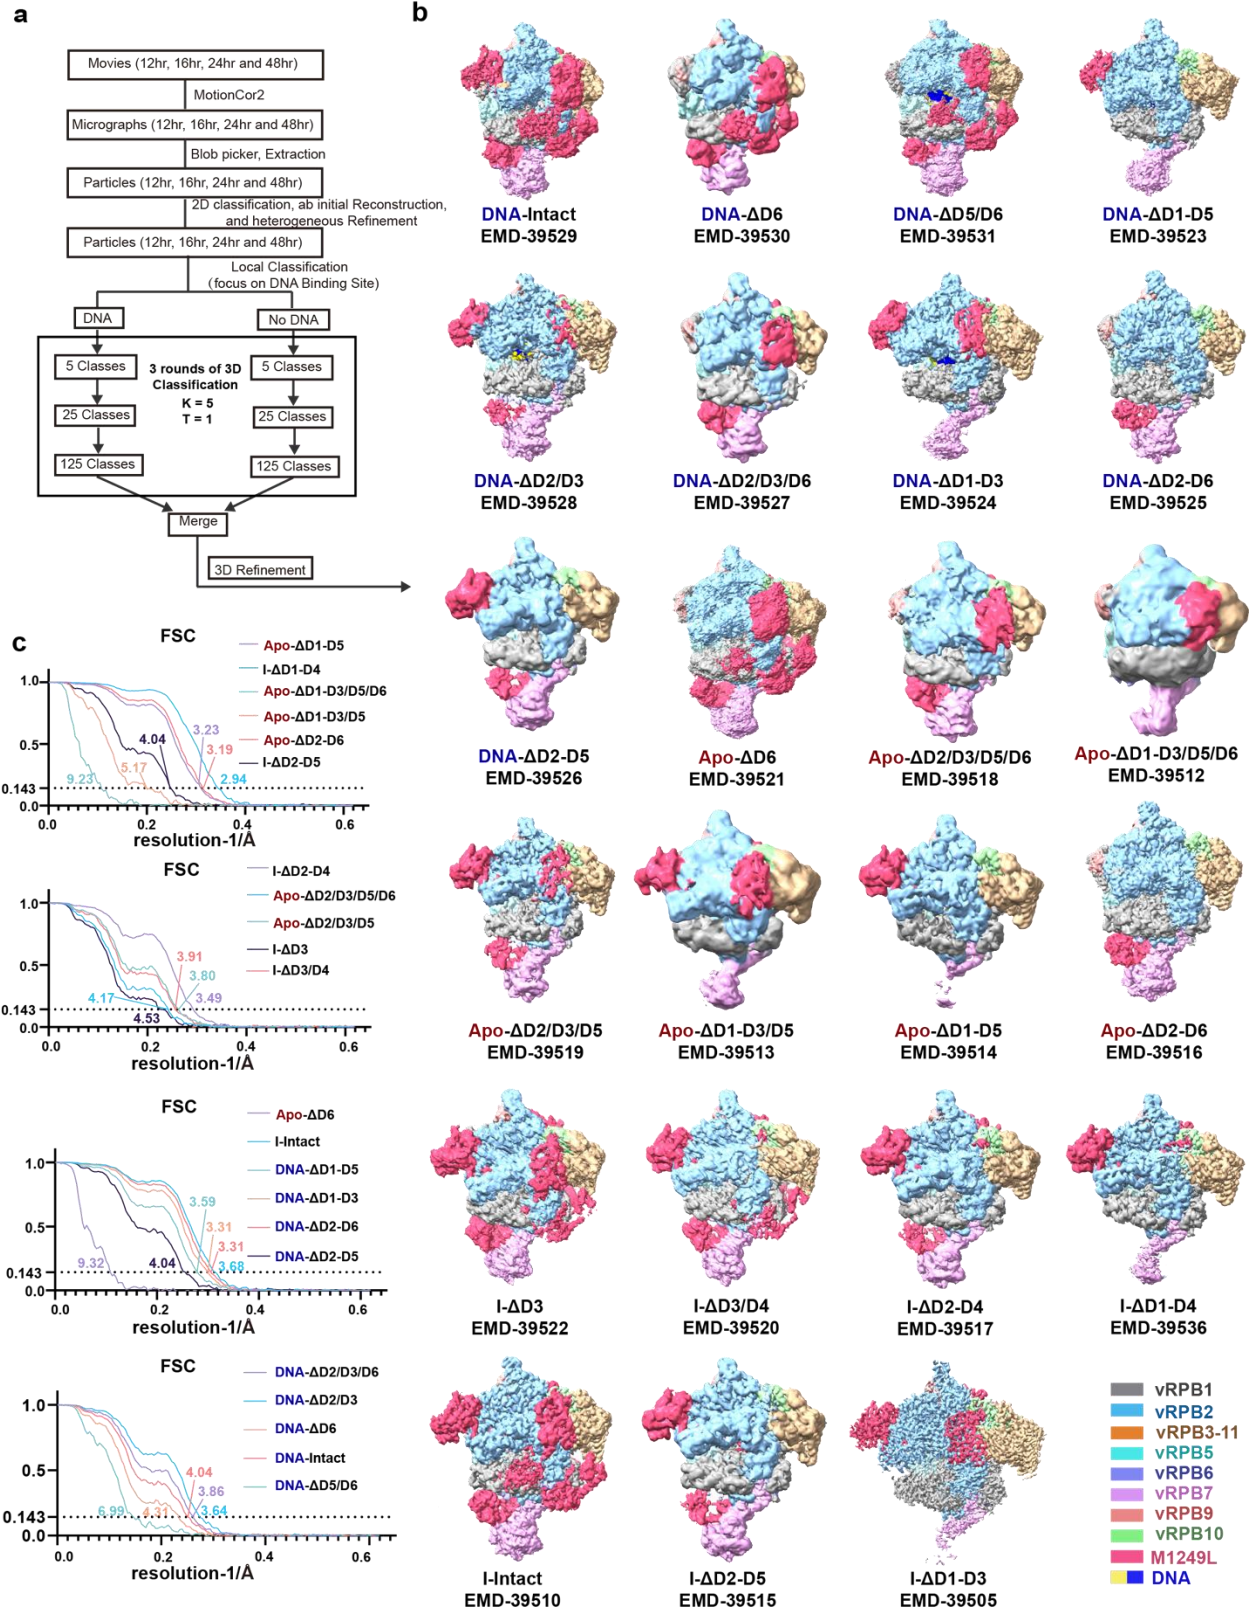

**Supplementary Figure 4: Structure Determination of Dynamic ASFV vRNAP-M1249L**

**Complex.** (a) Flow chart of image processing. (b) The dynamic variations of M1249L are depicted across 23 distinct cryo-EM maps. The color scheme is indicated at the right bottom of the panel. (c) FSC plots for consensus refinement.



**a**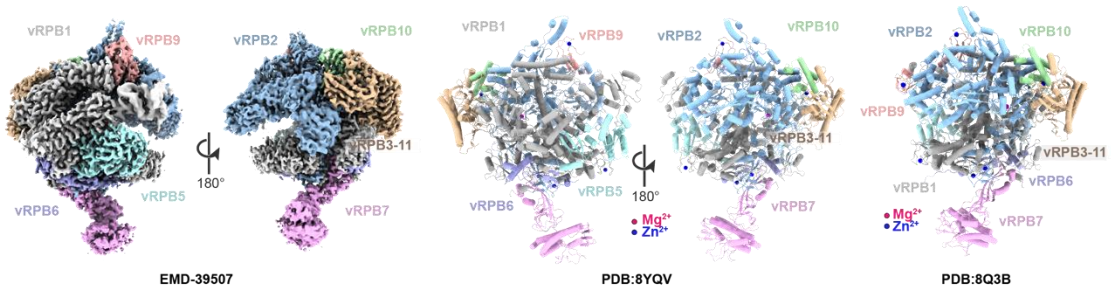**b**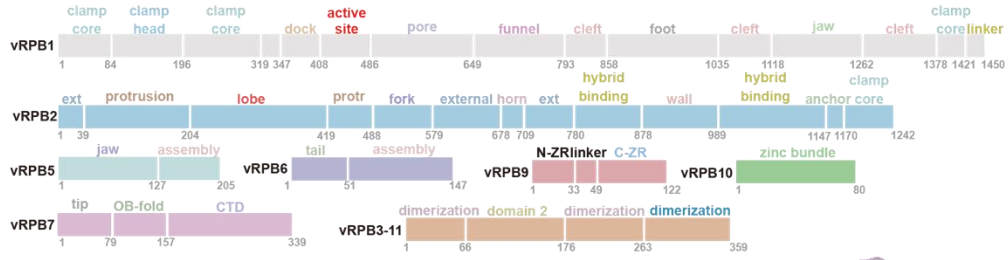**c**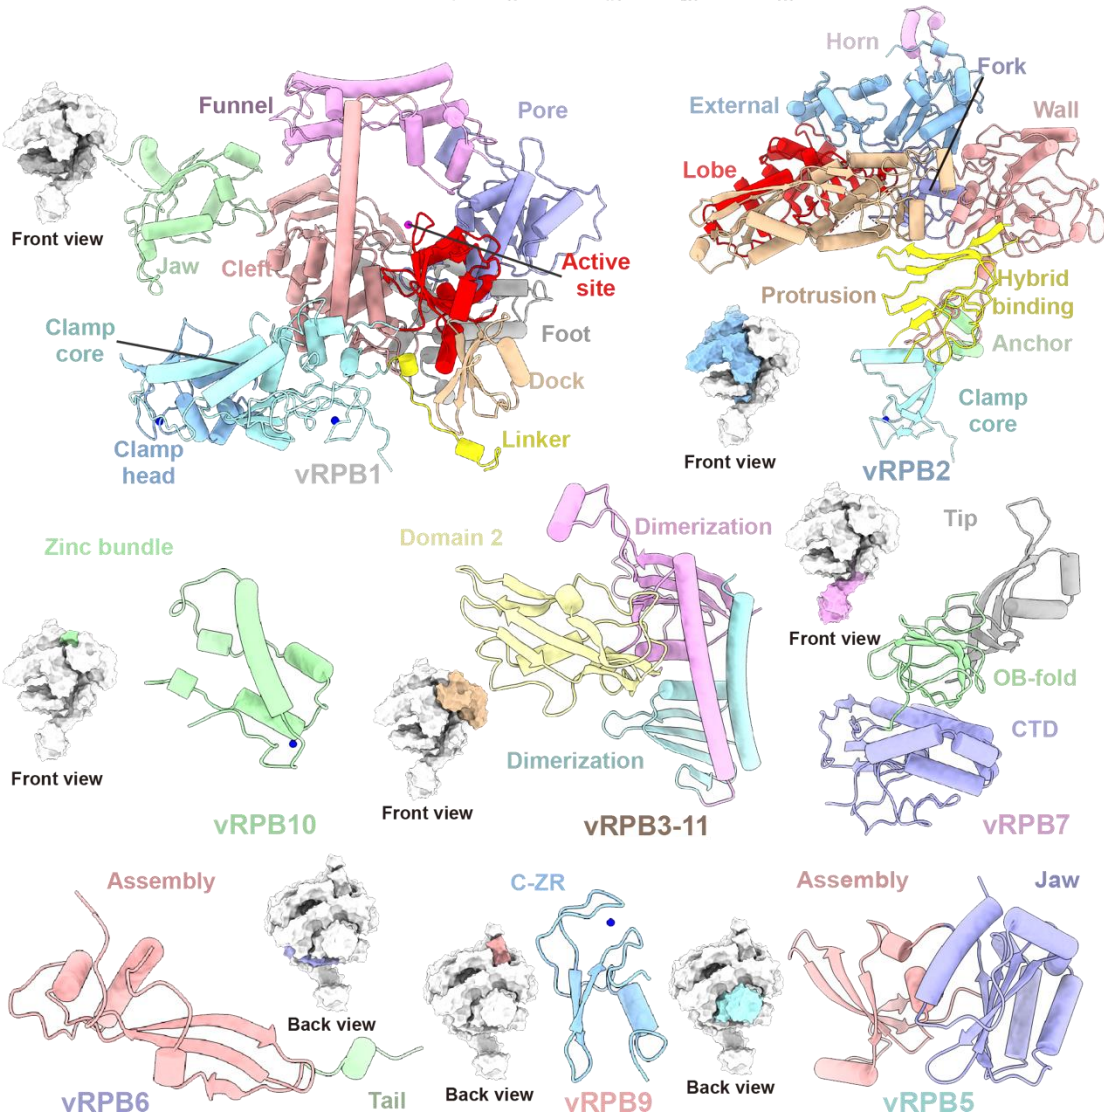

**Supplementary Figure 5: ASFV core vRNAP resembles typical eukaryotic RNA**

**polymerase II architecture. (a)** The cryo-EM map and the structure of the ASFV RNA

polymerase core (left, EMD-39507; middle, PDB:8YQV). The protein subunits are shown in

cartoon depiction, with helices depicted as cylinders. Comparison of our ASFV RNAP core to

the previously reported recombinant insect cell expressed RNAP (left, PDB: 8Q3B). Subunits are

colored as in (b). The active site metal  $Mg^{2+}$  and bound structural zinc ions are shown as spheres.

**(b)** Schematic depiction of ASFV vRNAP subunits. Functional domains are annotated based on

structure-based sequence alignment with VACV vRNAP. **(c)** Cartoon depiction of ASFV

vRNAP subunits with structural details shown. All subunits are colored as indicated in (b). The

location of the subunits in vRNAP complex is indicated schematically.

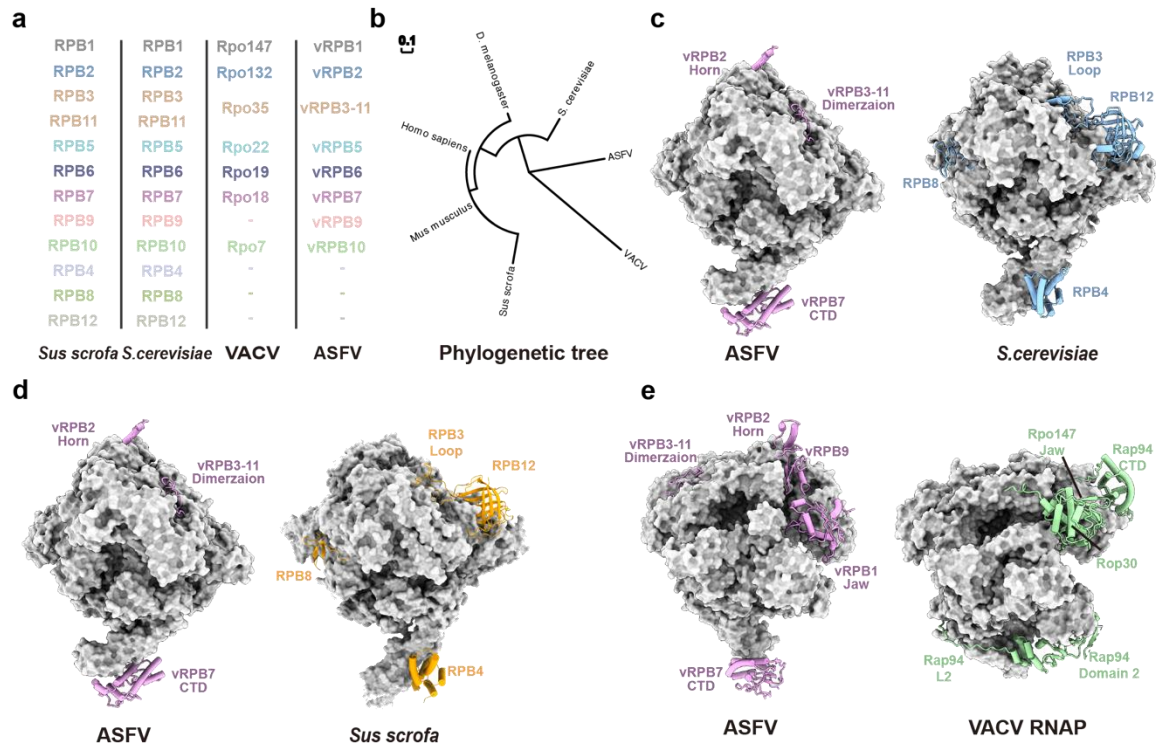

**Supplementary Figure 6: Comparison of ASFV RNA polymerase to homolog RNA**

**polymerases.** (a) Comparison of ASFV RNA Polymerase subunit composition to *S. cerevisiae* Pol II (PDB: 1WCM), Vaccinia RNA Polymerase (PDB: 6RIC), and *Sus scrofa* Pol II (PDB: 7EG7). The enzymes are depicted in schematic surface representation. Homologous subunits are indicated in the table and colored accordingly. (b) Phylogenetic tree analysis based on RNA polymerase sequence. (c/d/e) Detailed comparison of ASFV vRNAP with the other three RNA polymerases in pairs. The largely conserved core is depicted as schematic surface in gray, and the differing regions are depicted as cartoon. Regions specific to ASFV vRNAP are shown in purple and regions specific to *S. cerevisiae* Pol II in blue, Vaccinia RNA Polymerase in green and *Sus scrofa* Pol II in orange.

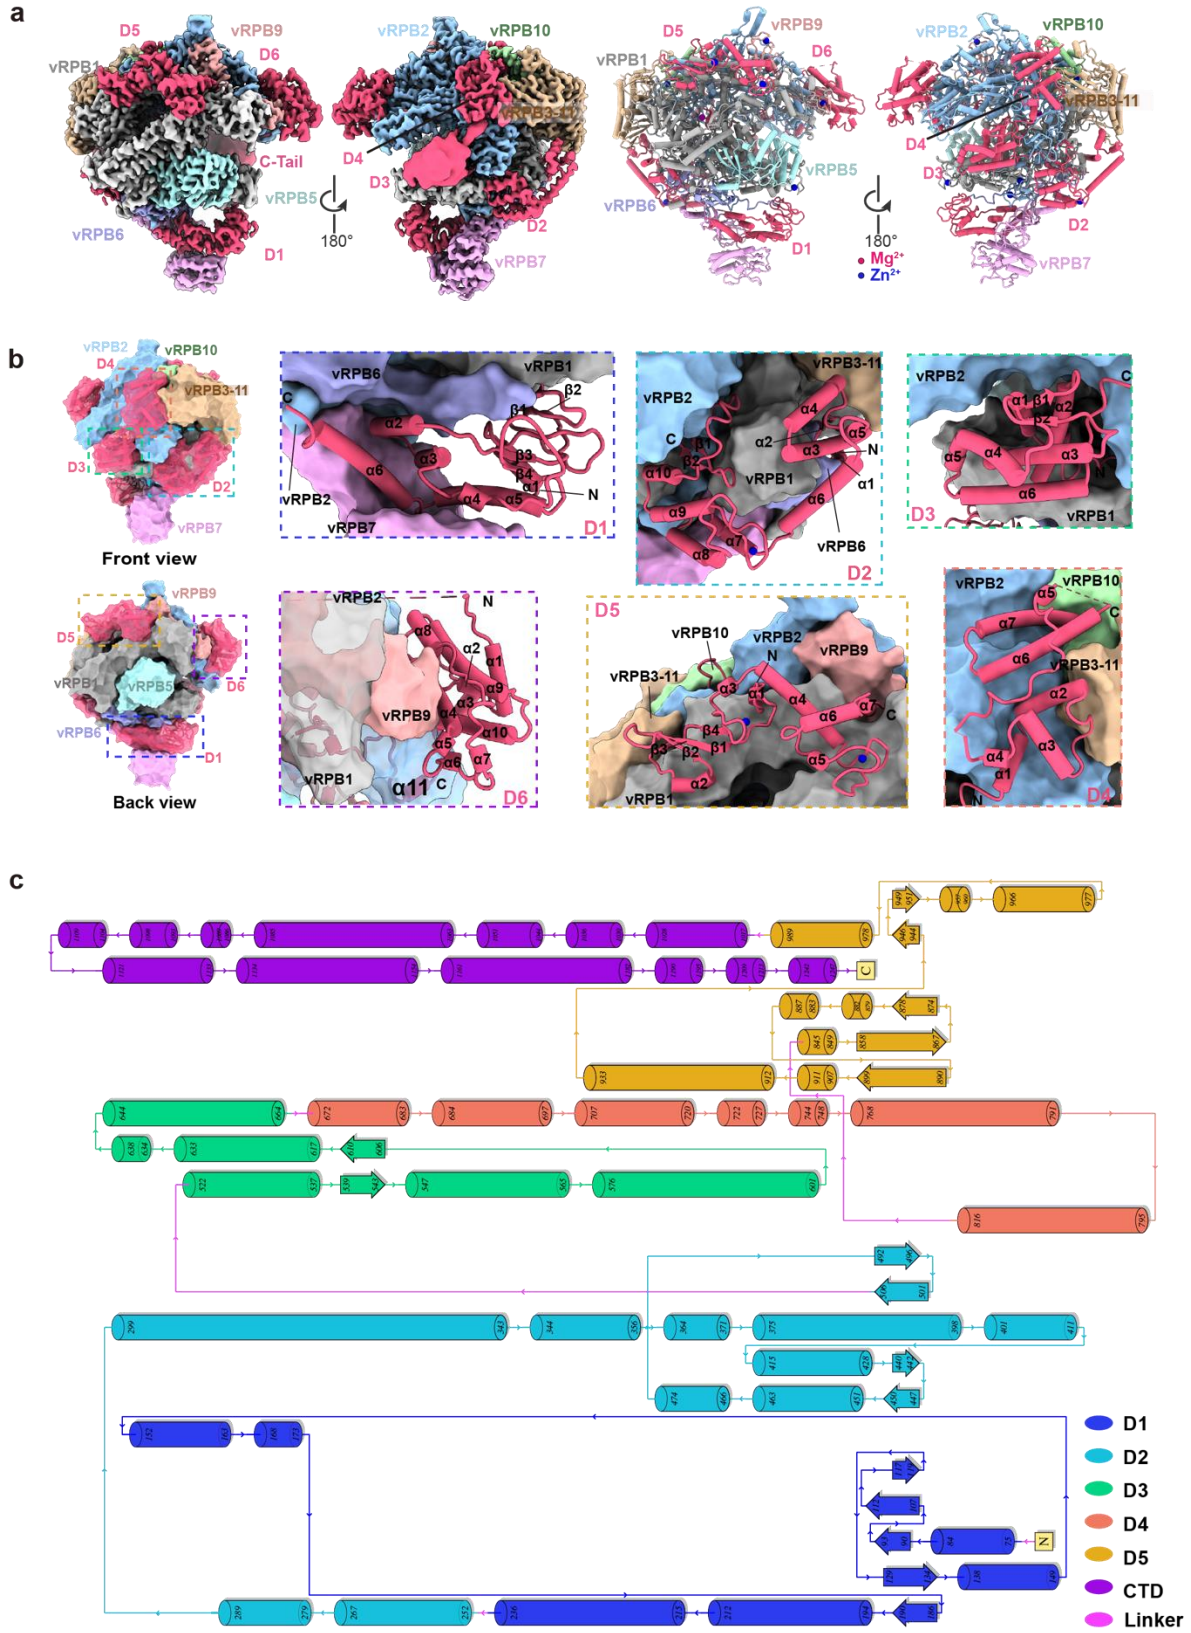

Topology diagrams of the individual domains of M1249L

**Supplementary Figure 7: The cryo-EM structures of ASFV vRNAP-M1249L Complex. (a)**

The cryo-EM map (D1:EMD-39509, D2:EMD-39506, D4/D5/D6:EMD-39505) and the structure of the ASFV vRNAP-M1249L complex (PDB:8YQY) shown in two different views rotated by 180°. The map of the M1249L D3 domain was assembled from a higher resolution map (EMD-39510). The protein is shown in cartoon depiction, with helices depicted as cylinders. Subunits are colored as in Fig. 2 (b). The active site metal A and bound zinc ions are shown as spheres. (b) Cartoon depiction of M1249L domains with structural details shown in close-in view (PDB:8YQY). All the domains of M1249L are colored in pink. The core vRNAP are depicted in schematic surface representation. All subunits are colored as indicated in (a). Domain 1 of M1249L features a bipartite structure with a mixed beta-sheet and an alpha-helix-rich lobe. It primarily interacts with the vRPB7 tip and CTD domains, slightly tilting the C-terminal MTase homolog domain. Minor interactions with vRPB1's clamp head and vRPB6's N-tail induce upward movements. Domain 2 contains two subdomains: the N-subdomain, consisting of two four-helix bundles interacting with vRPB1's 'foot' and 'dock', and the C-subdomain, which includes a four-helix bundle coordinating zinc and interacting with vRPB1 and vRPB2. Domain 3 features a five-helix bundle that binds between vRPB1 and vRPB2, existing at only ~1% density maps, suggesting its flexibility. Domain 4 comprises seven alpha-helices, stabilizing vRNAP's structure. Domain 5, linked to D4, surrounds the NTP entry channel and contains a zinc-finger motif that induces movements in vRPB1 and vRPB5. The C-terminal domain (CTD) has an alpha-helix bundle interacting with vRPB9 and a C-linker inducing movement of vRPB2. The final C-tail, containing an unstructured loop and a short helix, is positioned at the reaction center, enacting vital interactions. (c) Topological diagram display of M1249L domains from D1 to CTD. The colors of all domains correspond to the dashed boxes in (b).



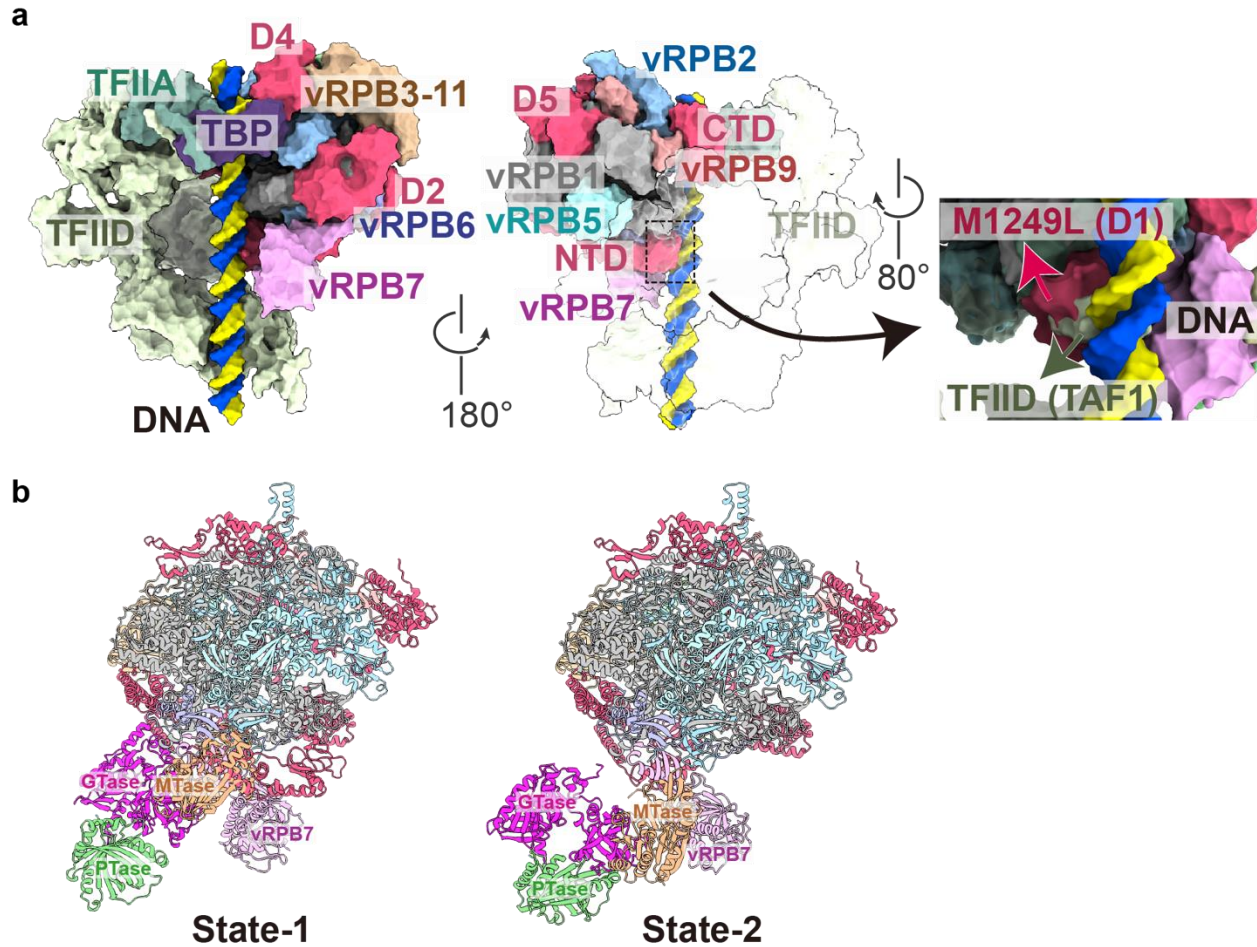

**Supplementary Figure 8: D1 of M1249L mimics TAF1 in the preinitiation complex. (a)**

Structural models of ASFV vRNAP superimposed on swine RNAP within the preinitiation complex (PDB: 7EG7), presented from two different views by 180°. The components of vRNAP, DNA, and transcription factors are individually labeled and color-coded. To emphasize the position of D1, TFIID is depicted with heightened transparency. The right panel provides a close-in view comparing D1 and TAF1. **(b)** Structural models of ASFV vRNAP complexed with ASFV capping enzyme (CE). The structures of the functional domains of methyltransferase (MTase), guanylyltransferase (GTase), and triphosphatase (TPase) are predicted using AlphaFold2 and assembled based on the VACV vRNAP structure (PDB: 6RIE). The left panel illustrates a significant clash between MTase and vRPB7, stabilized by D1 of M1249L. The right

panel demonstrates how the absence of D1 allows for a conformational shift in vRPB7, circumventing the clash.



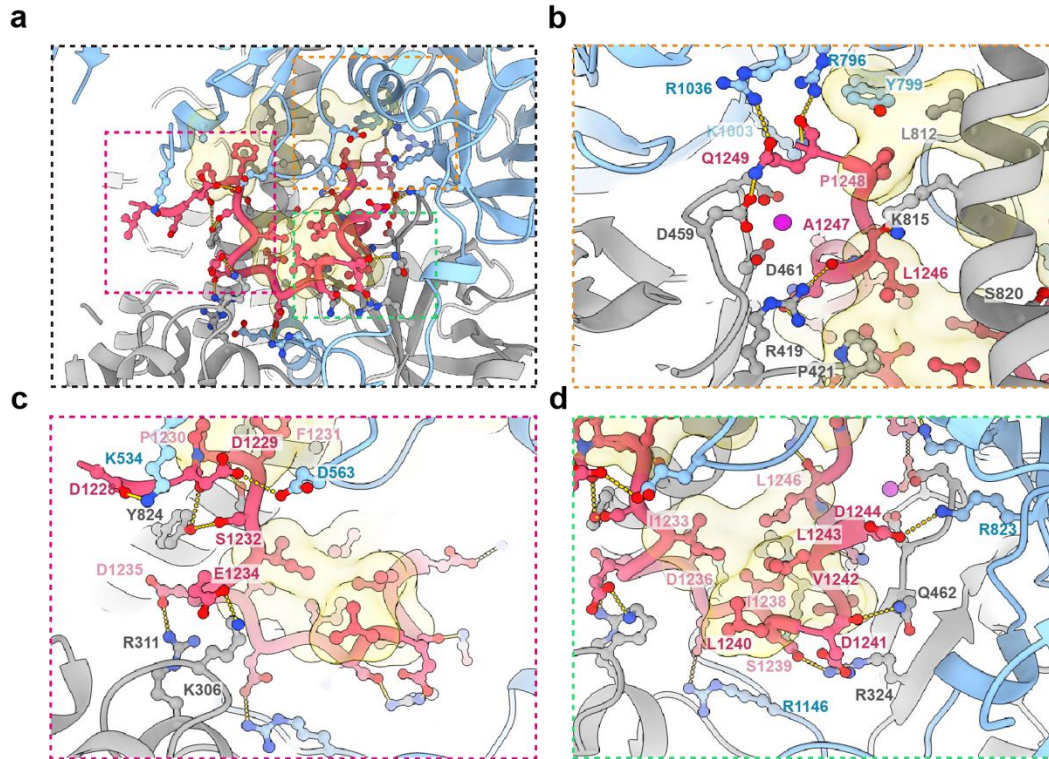

**Supplementary Figure 9: Interaction between M1249L C-tail and adjacent vRNAP**

**subunits. (a)** Overall interaction between M1249L C-tail and adjacent vRNAP subunits. **(b/c/d)**

Close-up view of the interaction. ASFV vRNAP subunits are depicted in cartoon, with vRPB1

colored grey and vRPB2 colored blue. Crucial amino acids are highlighted in sphere

representation.

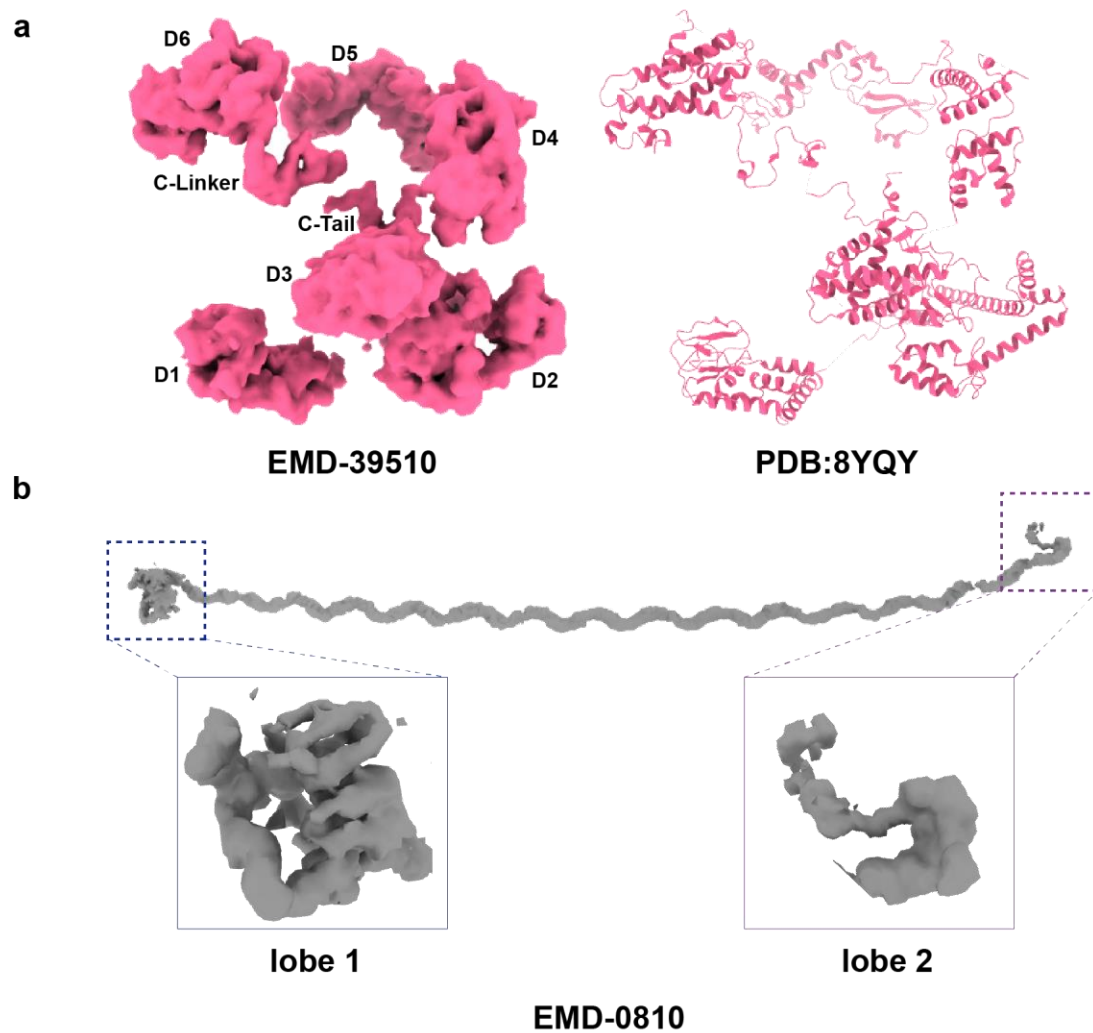

**Supplementary Figure 10: Comparison of the two different states of ASFV M1249L. (a)**

The cryo-EM map and the structure of the ASFV M1249L in this paper. **(b)** The cryo-EM map of the ASFV M1249L in virion. Close-up view of the lobe 1 and the lobe 2 of M1249L.

**Supplementary Table 1: Statistics for Cryo-EM imaging, data processing and refinement of models**

|                                                 | Core<br>PDB:8YQV | 2<br>PDB:8YQT   | 4<br>PDB:8YQX |
|-------------------------------------------------|------------------|-----------------|---------------|
| Data collection                                 |                  |                 |               |
| EM equipment                                    |                  | FEI Titan Krios |               |
| Voltage (kV)                                    |                  | 300             |               |
| Detector                                        |                  | Gatan Falcon 4  |               |
| Pixel size (Å/pixel)                            |                  | 0.808           |               |
| Electron dose (e <sup>-</sup> /Å <sup>2</sup> ) |                  | 40              |               |
| Defocus range (µm)                              |                  | 1-2.5           |               |
| Reconstruction                                  |                  |                 |               |
| Number of used particles                        | 354548           | 475234          | 218831        |
| Symmetry                                        |                  | C1              |               |
| Map sharpening B-factor (Å <sup>2</sup> )       | 105.5            | 101.4           | 118           |
| Final resolution (Å)                            | 2.67             | 2.56            | 2.97          |
| Model building                                  |                  |                 |               |
| Map CC (mask)                                   | 0.84             | 0.88            | 0.85          |
| Map CC (peaks)                                  | 0.55             | 0.64            | 0.48          |
| Map CC (volume)                                 | 0.82             | 0.84            | 0.8           |
| RMSD (bonds)                                    | 0.006            | 0.004           | 0.003         |
| RMSD (angles)                                   | 0.683            | 0.593           | 0.523         |
| Validation                                      |                  |                 |               |
| MolProbity score                                | 1.76             | 1.67            | 1.68          |
| Clash score                                     | 9.16             | 7.45            | 7.96          |
| Ramachandran plot                               |                  |                 |               |
| Outliers                                        | 0                | 0               | 0             |
| Allowed                                         | 3.94             | 3.19            | 3.69          |
| Favored                                         | 96.06            | 96.81           | 96.31         |
| Rotamer outliers                                | 0.36             | 1.22            | 0.72          |
| Cβ outliers                                     | 0                | 0.02            | 0             |

|                                                 | 3<br>PDB:8YQW | 1<br>PDB:8YQU   | Complete<br>PDB:8YQY |
|-------------------------------------------------|---------------|-----------------|----------------------|
| Data collection                                 |               |                 |                      |
| EM equipment                                    |               | FEI Titan Krios |                      |
| Voltage (kV)                                    |               | 300             |                      |
| Detector                                        |               | Gatan Falcon 4  |                      |
| Pixel size (Å/pixel)                            |               | 0.808           |                      |
| Electron dose (e <sup>-</sup> /Å <sup>2</sup> ) |               | 40              |                      |
| Defocus range (µm)                              |               | 1-2.5           |                      |
| Reconstruction                                  |               |                 |                      |
| Number of used particles                        | 218831        | 61437           | 10433                |
| Symmetry                                        |               | C1              |                      |
| Map sharpening B-factor (Å <sup>2</sup> )       | 95.8          | 83.4            | 80.1                 |
| Final resolution (Å)                            | 2.68          | 2.85            | 3.68                 |
| Model building                                  |               |                 |                      |
| Map CC (mask)                                   | 0.88          | 0.88            | 0.49                 |
| Map CC (peaks)                                  | 0.64          | 0.66            | 0.54                 |
| Map CC (volume)                                 | 0.85          | 0.85            | 0.54                 |
| RMSD (bonds)                                    | 0.004         | 0.003           | 0.004                |
| RMSD (angles)                                   | 0.555         | 0.552           | 1.013                |
| Validation                                      |               |                 |                      |
| MolProbity score                                | 1.6           | 1.73            | 1.77                 |
| Clash score                                     | 6.97          | 8.44            | 9.41                 |
| Ramachandran plot                               |               |                 |                      |
| Outliers                                        | 0.02          | 0               | 0.06                 |
| Allowed                                         | 3.36          | 3.95            | 3.87                 |
| Favored                                         | 96.62         | 96.05           | 96.07                |
| Rotamer outliers                                | 0.32          | 0.31            | 0.27                 |
| Cβ outliers                                     | 0.02          | 0.02            | 0.09                 |

|                                                 | DNA Complex<br>PDB:8YQZ | 5<br>EMD-39514  | 6<br>EMD-39512 |
|-------------------------------------------------|-------------------------|-----------------|----------------|
| Data collection                                 |                         |                 |                |
| EM equipment                                    |                         | FEI Titan Krios |                |
| Voltage (kV)                                    |                         | 300             |                |
| Detector                                        |                         | Gatan Falcon 4  |                |
| Pixel size (Å/pixel)                            |                         | 0.808           |                |
| Electron dose (e <sup>-</sup> /Å <sup>2</sup> ) |                         | 40              |                |
| Defocus range (µm)                              |                         | 1-2.5           |                |
| Reconstruction                                  |                         |                 |                |
| Number of used particles                        | 266388                  | 67546           | 4964           |
| Symmetry                                        |                         | C1              |                |
| Map sharpening B-factor (Å <sup>2</sup> )       | 104.1                   | 96.9            | 315.5          |
| Final resolution (Å)                            | 2.78                    | 3.23            | 9.23           |
| Model building                                  |                         |                 |                |
| Map CC (mask)                                   | 0.86                    |                 |                |
| Map CC (peaks)                                  | 0.7                     |                 |                |
| Map CC (volume)                                 | 0.81                    |                 |                |
| RMSD (bonds)                                    | 0.008                   |                 |                |
| RMSD (angles)                                   | 0.767                   |                 |                |
| Validation                                      |                         |                 |                |
| MolProbity score                                | 1.98                    |                 |                |
| Clash score                                     | 7.73                    |                 |                |
| Ramachandran plot                               |                         |                 |                |
| Outliers                                        | 0                       |                 |                |
| Allowed                                         | 3.67                    |                 |                |
| Favored                                         | 96.33                   |                 |                |
| Rotamer outliers                                | 2.55                    |                 |                |
| Cβ outliers                                     | 0                       |                 |                |

|                                                 | 7         | 8               | 9         |
|-------------------------------------------------|-----------|-----------------|-----------|
|                                                 | EMD-39513 | EMD-39516       | EMD-39515 |
| Data collection                                 |           |                 |           |
| EM equipment                                    |           | FEI Titan Krios |           |
| Voltage (kV)                                    |           | 300             |           |
| Detector                                        |           | Gatan Falcon 4  |           |
| Pixel size (Å/pixel)                            |           | 0.808           |           |
| Electron dose (e <sup>-</sup> /Å <sup>2</sup> ) |           | 40              |           |
| Defocus range (µm)                              |           | 1-2.5           |           |
| Reconstruction                                  |           |                 |           |
| Number of used particles                        | 43341     | 71418           | 150008    |
| Symmetry                                        |           | C1              |           |
| Map sharpening B-factor (Å <sup>2</sup> )       | 158.8     | 90.2            | 95.9      |
| Final resolution (Å)                            | 5.17      | 3.19            | 4.04      |
| Model building                                  |           |                 |           |
| Map CC (mask)                                   |           |                 |           |
| Map CC (peaks)                                  |           |                 |           |
| Map CC (volume)                                 |           |                 |           |
| RMSD (bonds)                                    |           |                 |           |
| RMSD (angles)                                   |           |                 |           |
| Validation                                      |           |                 |           |
| MolProbity score                                |           |                 |           |
| Clash score                                     |           |                 |           |
| Ramachandran plot                               |           |                 |           |
| Outliers                                        |           |                 |           |
| Allowed                                         |           |                 |           |
| Favored                                         |           |                 |           |
| Rotamer outliers                                |           |                 |           |
| Cβ outliers                                     |           |                 |           |

|                                                 | 10        | 11              | 12        |
|-------------------------------------------------|-----------|-----------------|-----------|
|                                                 | EMD-39517 | EMD-39518       | EMD-39519 |
| Data collection                                 |           |                 |           |
| EM equipment                                    |           | FEI Titan Krios |           |
| Voltage (kV)                                    |           | 300             |           |
| Detector                                        |           | Gatan Falcon 4  |           |
| Pixel size (Å/pixel)                            |           | 0.808           |           |
| Electron dose (e <sup>-</sup> /Å <sup>2</sup> ) |           | 40              |           |
| Defocus range (µm)                              |           | 1-2.5           |           |
| Reconstruction                                  |           |                 |           |
| Number of used particles                        | 36680     | 14293           | 17646     |
| Symmetry                                        |           | C1              |           |
| Map sharpening B-factor (Å <sup>2</sup> )       | 75.2      | 105.2           | 81.8      |
| Final resolution (Å)                            | 3.49      | 4.17            | 3.8       |
| Model building                                  |           |                 |           |
| Map CC (mask)                                   |           |                 |           |
| Map CC (peaks)                                  |           |                 |           |
| Map CC (volume)                                 |           |                 |           |
| RMSD (bonds)                                    |           |                 |           |
| RMSD (angles)                                   |           |                 |           |
| Validation                                      |           |                 |           |
| MolProbity score                                |           |                 |           |
| Clash score                                     |           |                 |           |
| Ramachandran plot                               |           |                 |           |
| Outliers                                        |           |                 |           |
| Allowed                                         |           |                 |           |
| Favored                                         |           |                 |           |
| Rotamer outliers                                |           |                 |           |
| Cβ outliers                                     |           |                 |           |

|                                                 | 13        | 14              | 15        |
|-------------------------------------------------|-----------|-----------------|-----------|
|                                                 | EMD-39521 | EMD-39520       | EMD-39522 |
| Data collection                                 |           |                 |           |
| EM equipment                                    |           | FEI Titan Krios |           |
| Voltage (kV)                                    |           | 300             |           |
| Detector                                        |           | Gatan Falcon 4  |           |
| Pixel size (Å/pixel)                            |           | 0.808           |           |
| Electron dose (e <sup>-</sup> /Å <sup>2</sup> ) |           | 40              |           |
| Defocus range (µm)                              |           | 1-2.5           |           |
| Reconstruction                                  |           |                 |           |
| Number of used particles                        | 1010      | 16732           | 5609      |
| Symmetry                                        |           | C1              |           |
| Map sharpening B-factor (Å <sup>2</sup> )       | 320       | 84.5            | 77.1      |
| Final resolution (Å)                            | 9.32      | 3.91            | 4.53      |
| Model building                                  |           |                 |           |
| Map CC (mask)                                   |           |                 |           |
| Map CC (peaks)                                  |           |                 |           |
| Map CC (volume)                                 |           |                 |           |
| RMSD (bonds)                                    |           |                 |           |
| RMSD (angles)                                   |           |                 |           |
| Validation                                      |           |                 |           |
| MolProbity score                                |           |                 |           |
| Clash score                                     |           |                 |           |
| Ramachandran plot                               |           |                 |           |
| Outliers                                        |           |                 |           |
| Allowed                                         |           |                 |           |
| Favored                                         |           |                 |           |
| Rotamer outliers                                |           |                 |           |
| Cβ outliers                                     |           |                 |           |



|                                                 | 16        | 17              | 18        |
|-------------------------------------------------|-----------|-----------------|-----------|
|                                                 | EMD-39523 | EMD-39524       | EMD-39525 |
| Data collection                                 |           |                 |           |
| EM equipment                                    |           | FEI Titan Krios |           |
| Voltage (kV)                                    |           | 300             |           |
| Detector                                        |           | Gatan Falcon 4  |           |
| Pixel size (Å/pixel)                            |           | 0.808           |           |
| Electron dose (e <sup>-</sup> /Å <sup>2</sup> ) |           | 40              |           |
| Defocus range (μm)                              |           | 1-2.5           |           |
| Reconstruction                                  |           |                 |           |
| Number of used particles                        | 20290     | 42466           | 53916     |
| Symmetry                                        |           | C1              |           |
| Map sharpening B-factor (Å <sup>2</sup> )       | 81.1      | 90.7            | 95        |
| Final resolution (Å)                            | 3.59      | 3.31            | 3.31      |
| Model building                                  |           |                 |           |
| Map CC (mask)                                   |           |                 |           |
| Map CC (peaks)                                  |           |                 |           |
| Map CC (volume)                                 |           |                 |           |
| RMSD (bonds)                                    |           |                 |           |
| RMSD (angles)                                   |           |                 |           |
| Validation                                      |           |                 |           |
| MolProbity score                                |           |                 |           |
| Clash score                                     |           |                 |           |
| Ramachandran plot                               |           |                 |           |
| Outliers                                        |           |                 |           |
| Allowed                                         |           |                 |           |
| Favored                                         |           |                 |           |
| Rotamer outliers                                |           |                 |           |
| Cβ outliers                                     |           |                 |           |

|                                                 | 19        | 20              | 21        |
|-------------------------------------------------|-----------|-----------------|-----------|
|                                                 | EMD-39526 | EMD-39527       | EMD-39528 |
| Data collection                                 |           |                 |           |
| EM equipment                                    |           | FEI Titan Krios |           |
| Voltage (kV)                                    |           | 300             |           |
| Detector                                        |           | Gatan Falcon 4  |           |
| Pixel size (Å/pixel)                            |           | 0.808           |           |
| Electron dose (e <sup>-</sup> /Å <sup>2</sup> ) |           | 40              |           |
| Defocus range (µm)                              |           | 1-2.5           |           |
| Reconstruction                                  |           |                 |           |
| Number of used particles                        | 15559     | 17839           | 24386     |
| Symmetry                                        |           | C1              |           |
| Map sharpening B-factor (Å <sup>2</sup> )       | 89.2      | 91.4            | 85.5      |
| Final resolution (Å)                            | 4.04      | 3.86            | 3.64      |
| Model building                                  |           |                 |           |
| Map CC (mask)                                   |           |                 |           |
| Map CC (peaks)                                  |           |                 |           |
| Map CC (volume)                                 |           |                 |           |
| RMSD (bonds)                                    |           |                 |           |
| RMSD (angles)                                   |           |                 |           |
| Validation                                      |           |                 |           |
| MolProbity score                                |           |                 |           |
| Clash score                                     |           |                 |           |
| Ramachandran plot                               |           |                 |           |
| Outliers                                        |           |                 |           |
| Allowed                                         |           |                 |           |
| Favored                                         |           |                 |           |
| Rotamer outliers                                |           |                 |           |
| Cβ outliers                                     |           |                 |           |

|                                                 | 22        | 23        | 24              | 25        |
|-------------------------------------------------|-----------|-----------|-----------------|-----------|
|                                                 | EMD-39530 | EMD-39531 | EMD-39529       | EMD-39536 |
| Data collection                                 |           |           |                 |           |
| EM equipment                                    |           |           | FEI Titan Krios |           |
| Voltage (kV)                                    |           |           | 300             |           |
| Detector                                        |           |           | Gatan Falcon 4  |           |
| Pixel size (Å/pixel)                            |           |           | 0.808           |           |
| Electron dose (e <sup>-</sup> /Å <sup>2</sup> ) |           |           | 40              |           |
| Defocus range (µm)                              |           |           | 1-2.5           |           |
| Reconstruction                                  |           |           |                 |           |
| Number of used particles                        | 5431      | 2338      | 9630            | 135954    |
| Symmetry                                        |           | C1        |                 |           |
| Map sharpening B-factor (Å <sup>2</sup> )       | 100       | 92        | 97.2            | 84.1      |
| Final resolution (Å)                            | 4.31      | 6.99      | 4.04            | 2.94      |
| Model building                                  |           |           |                 |           |
| Map CC (mask)                                   |           |           |                 |           |
| Map CC (peaks)                                  |           |           |                 |           |
| Map CC (volume)                                 |           |           |                 |           |
| RMSD (bonds)                                    |           |           |                 |           |
| RMSD (angles)                                   |           |           |                 |           |
| Validation                                      |           |           |                 |           |
| MolProbity score                                |           |           |                 |           |
| Clash score                                     |           |           |                 |           |
| Ramachandran plot                               |           |           |                 |           |
| Outliers                                        |           |           |                 |           |
| Allowed                                         |           |           |                 |           |
| Favored                                         |           |           |                 |           |
| Rotamer outliers                                |           |           |                 |           |
| Cβ outliers                                     |           |           |                 |           |

|                    | M1249L-D1 | M1249L-D2 | M1249L-D3  |
|--------------------|-----------|-----------|------------|
| Model building     |           |           |            |
| Map CC (mask)      | 0.72      | 0.74      | 0.53       |
| Map CC (peaks)     | 0.66      | 0.76      | 0.74       |
| Map CC (volume)    | 0.73      | 0.74      | 0.53       |
| RMSD (bonds)       | 0.004     | 0.004     | 0.012      |
| RMSD (angles)      | 1.001     | 0.979     | 1.667      |
| Validation         |           |           |            |
| MolProbity score   | 2.16      | 2.07      | 0.94       |
| Clash score        | 13.26     | 10.23     | 1.79       |
| Ramachandran plot  |           |           |            |
| Outliers           | 0         | 0         | 0          |
| Allowed            | 9.15      | 9.69      | 1.53       |
| Favored            | 90.85     | 90.31     | 98.47      |
| Rotamer outliers   | 0.68      | 0         | 0          |
| C $\beta$ outliers | NA        | NA        | 0.76       |
|                    | M1249L-D4 | M1249L-D5 | M1249L-CTD |
| Model building     |           |           |            |
| Map CC (mask)      | 0.66      | 0.74      | 0.73       |
| Map CC (peaks)     | 0.64      | 0.68      | 0.70       |
| Map CC (volume)    | 0.66      | 0.74      | 0.73       |
| RMSD (bonds)       | 0.008     | 0.004     | 0.004      |
| RMSD (angles)      | 1.252     | 0.937     | 0.988      |
| Validation         |           |           |            |
| MolProbity score   | 3.09      | 1.89      | 1.61       |
| Clash score        | 19.60     | 9.11      | 5.54       |
| Ramachandran plot  |           |           |            |
| Outliers           | 0         | 0         | 0          |
| Allowed            | 6.5       | 2.76      | 4.42       |
| Favored            | 93.5      | 97.24     | 95.58      |
| Rotamer outliers   | 14.16     | 2.22      | 0.48       |
| C $\beta$ outliers | 0.81      | NA        | NA         |

\* All domain structures of the M1249L were validated from the **best resolution map** (D1, EMD-39509, PDB:8YQX; D2, EMD-39506, PDB:8YQU; D3, EMD-39510, 8YQY; D4/D5/CTD, EMD-39505, PDB:8YQT).

**Supplementary Table 2: Summary of models**

| <b>Subunit Name</b>                          | <b>Chain</b> | <b>Total residues/<br/>range built</b>                         | <b>Unmodelled residues</b>                                      | <b>% atomic<br/>model</b> |
|----------------------------------------------|--------------|----------------------------------------------------------------|-----------------------------------------------------------------|---------------------------|
| ASFV RNAP Polymerase core                    |              |                                                                |                                                                 |                           |
| vRPB1                                        | A            | 1450/2-212, 224-275, 297-1056, 1073-1132, 1143-1212, 1221-1442 | 1, 213-223, 276-296, 1057-1072, 1133-1142, 1213-1220, 1443-1450 | 1375/1450                 |
| vRPB2                                        | B            | 1242/8-217, 225-489, 504-526, 537-940, 949-1242                | 1-7, 218-224, 490-503, 527-536, 941-948                         | 1196/1242                 |
| vRPB3-11                                     | C            | 359/3-359                                                      | 45293                                                           | 357/359                   |
| vRPB5                                        | D            | 205/1-205                                                      | -                                                               | 205/205                   |
| vRPB6                                        | E            | 147/42-147                                                     | 1-41                                                            | 106/147                   |
| vRPB7                                        | F            | 339/1-339                                                      | -                                                               | 339/339                   |
| vRPB9                                        | G            | 105/47-105                                                     | 1-46                                                            | 59/105                    |
| vRPB10                                       | H            | 80/1-80                                                        | -                                                               | 80/80                     |
| ASFV RNAP Polymerase-M1249L Complex Complete |              |                                                                |                                                                 |                           |
| vRPB1                                        | A            | 1450/2-211, 225-275, 297-1442                                  | 1, 212-224, 276-296,                                            | 1407/1450                 |
| vRPB2                                        | B            | 1242/4-218, 225-489, 504-528, 533-940, 949-1242                | 1-3, 219-224, 490-503, 529-532, 941-948                         | 1207/1242                 |
| vRPB3-11                                     | C            | 359/3-359                                                      | 45293                                                           | 357/359                   |
| vRPB5                                        | D            | 205/1-205                                                      | -                                                               | 205/205                   |
| vRPB6                                        | E            | 147/39-147                                                     | 1-38                                                            | 109/147                   |
| vRPB7                                        | F            | 335/1-335                                                      | -                                                               | 335/335                   |
| vRPB9                                        | G            | 105/1-105                                                      | -                                                               | 105/105                   |
| vRPB10                                       | H            | 80/1-80                                                        | -                                                               | 80/80                     |
| M1249L                                       | J            | 1249/74-239, 247-729, 734-755, 768-991, 1011-1218, 1227-1249   | 1-73, 240-246, 730-733, 756-767, 992-1010, 1219-1226            | 1126/1249                 |
| ASFV RNAP Polymerase-M1249L Complex 2        |              |                                                                |                                                                 |                           |
| vRPB1                                        | A            | 1450/1-212, 224-275, 297-1442                                  | 213-223, 276-296, 1443-1450                                     | 1410/1450                 |
| vRPB2                                        | B            | 1242/4-218, 225-489, 504-527, 535-940, 949-1242                | 1-3, 219-224, 490-503, 528-534, 941-948                         | 1204/1242                 |
| vRPB3-11                                     | C            | 359/1-359                                                      | -                                                               | 359/359                   |
| vRPB5                                        | D            | 205/1-205                                                      | -                                                               | 205/205                   |
| vRPB6                                        | E            | 147/48-147                                                     | 1-47                                                            | 100/147                   |
| vRPB7                                        | F            | 339/1-339                                                      | -                                                               | 339/339                   |
| vRPB9                                        | G            | 105/1-105                                                      | -                                                               | 105/105                   |
| vRPB10                                       | H            | 80/1-80                                                        | -                                                               | 80/80                     |
| M1249L                                       | J            | 1249/672-751, 771-991, 1011-1217, 1227-1249                    | 1-671, 752-770, 992-1010, 1216-1226                             | 531/1249                  |
| ASFV RNAP Polymerase-M1249L Complex 1        |              |                                                                |                                                                 |                           |
| vRPB1                                        | A            | 1450/2-211, 225-275, 297-1442                                  | 1, 212-224, 276-296, 1443-1450                                  | 1407/1450                 |

|          |   |                                                                 |                                                          |           |
|----------|---|-----------------------------------------------------------------|----------------------------------------------------------|-----------|
| vRPB2    | B | 1242/4-218, 225-489, 504-528,<br>533-940, 949-1242              | 1-3, 219-224, 490-503, 529-<br>532, 941-948              | 1207/1242 |
| vRPB3-11 | C | 359/3-359                                                       | 45293                                                    | 357/359   |
| vRPB5    | D | 205/1-205                                                       | -                                                        | 205/205   |
| vRPB6    | E | 147/39-147                                                      | 1-38                                                     | 109/147   |
| vRPB7    | F | 339/1-335                                                       | 336-339                                                  | 335/339   |
| vRPB9    | G | 105/1-105                                                       | -                                                        | 105/105   |
| vRPB10   | H | 80/1-80                                                         | -                                                        | 80/80     |
| M1249L   | J | 1249/74-239, 247-517, 672-751,<br>768-991, 1011-1218, 1227-1249 | 1-73, 240-246, 518-671, 752-<br>767, 992-1010, 1219-1226 | 972/1249  |

| <b>Subunit Name</b>                   | <b>Chain</b> | <b>Total residues/<br/>range built</b>                  | <b>Unmodelled residues</b>                      | <b>% atomic model</b> |
|---------------------------------------|--------------|---------------------------------------------------------|-------------------------------------------------|-----------------------|
| ASFV RNAP Polymerase-M1249L Complex 3 |              |                                                         |                                                 |                       |
| vRPB1                                 | A            | 1450/2-211, 225-275, 297-1442                           | 1, 212-224, 276-296, 1443-<br>1450              | 1407/1450             |
| vRPB2                                 | B            | 1242/4-218, 225-489, 504-528,<br>533-940, 949-1242      | 1-3, 219-224, 490-503, 529-<br>532, 941-948     | 1207/1242             |
| vRPB3-11                              | C            | 359/3-359                                               | 1/2                                             | 357/359               |
| vRPB5                                 | D            | 205/1-205                                               | -                                               | 205/205               |
| vRPB6                                 | E            | 147/39-147                                              | 1-38                                            | 109/147               |
| vRPB7                                 | F            | 339/1-336                                               | 337-339                                         | 336/339               |
| vRPB9                                 | G            | 105/1-105                                               | -                                               | 105/105               |
| vRPB10                                | H            | 80/1-80                                                 | -                                               | 80/80                 |
| M1249L                                | J            | 1249/74-239, 672-751, 768-<br>991, 1011-1218, 1227-1249 | 1-73, 240-671, 752-767, 992-<br>1010, 1219-1226 | 701/1249              |
| ASFV RNAP Polymerase-M1249L Complex 4 |              |                                                         |                                                 |                       |
| vRPB1                                 | A            | 1450/1-212, 224-275                                     | 213-223, 276-1450                               | 264/1450              |
| vRPB7                                 | F            | 339/1-336                                               | 337-339                                         | 336/339               |
| M1249L                                | J            | 1249/74-239                                             | 1-73, 240-1249                                  | 166/1249              |

**Supplementary Table 3: Dynamic structures of ASFV RNA polymerase core and its complexes with DNA and M1249L**

|                                             | EMD   | PDB  |                  | D1 | D2 | D3 | D4 | D5 | D6 | C-tail | DNA |
|---------------------------------------------|-------|------|------------------|----|----|----|----|----|----|--------|-----|
| ASFV RNA polymerase-M1249L complex 24       | 39529 |      | DNA-Intact       | √  | √  | √  | √  | √  | √  |        | √   |
| ASFV RNA polymerase-M1249L complex 22       | 39530 |      | DNA-ΔD6          | √  | √  | √  | √  | √  |    |        | √   |
| ASFV RNA polymerase-M1249L complex 23       | 39531 |      | DNA-ΔD5/D6       | √  | √  | √  | √  |    |    |        | √   |
| ASFV RNA polymerase-M1249L complex 21       | 39528 |      | DNA-ΔD2/D3       | √  |    |    | √  | √  | √  |        | √   |
| ASFV RNA polymerase-M1249L complex 20       | 39527 |      | DNA-ΔD2/D3/D6    | √  |    |    | √  | √  |    |        | √   |
| ASFV RNA polymerase-M1249L complex 17       | 39524 |      | DNA-ΔD1-D3       |    |    |    | √  | √  | √  |        | √   |
| ASFV RNA polymerase-M1249L complex 19       | 39526 |      | DNA-ΔD2-D5       | √  |    |    |    |    | √  |        | √   |
| ASFV RNA polymerase-M1249L complex 16       | 39523 |      | DNA-ΔD1-D5       |    |    |    |    |    | √  |        | √   |
| ASFV RNA polymerase-M1249L complex 18       | 39525 |      | DNA-ΔD2-D6       | √  |    |    |    |    |    |        | √   |
| ASFV RNA polymerase-M1249L complex 13       | 39521 |      | Apo-ΔD6          | √  | √  | √  | √  | √  |    |        |     |
| ASFV RNA polymerase-M1249L complex 12       | 39519 |      | Apo-ΔD2/D3/D5    | √  |    |    | √  |    | √  |        |     |
| ASFV RNA polymerase-M1249L complex 7        | 39513 |      | Apo-ΔD1-D3/D5    |    |    |    | √  |    | √  |        |     |
| ASFV RNA polymerase-M1249L complex11        | 39518 |      | Apo-ΔD2/D3/D5/D6 | √  |    |    | √  |    |    |        |     |
| ASFV RNA polymerase-M1249L complex 5        | 39514 |      | Apo-ΔD1-D5       |    |    |    |    |    | √  |        |     |
| ASFV RNA polymerase-M1249L complex 6        | 39512 |      | Apo-ΔD1-D3/D5/D6 |    |    |    | √  |    |    |        |     |
| ASFV RNA polymerase-M1249L complex 8        | 39516 |      | Apo-ΔD2-D6       | √  |    |    |    |    |    |        |     |
| ASFV RNA polymerase-M1249L complex complete | 39510 | 8YQY | I-Intact         | √  | √  | √  | √  | √  | √  | √      |     |
| ASFV RNA polymerase-M1249L complex 15       | 39522 |      | I-ΔD3            | √  | √  |    | √  | √  | √  | √      |     |
| ASFV RNA polymerase-M1249L complex 14       | 39520 |      | I-ΔD3/D4         | √  | √  |    |    | √  | √  | √      |     |
| ASFV RNA polymerase-M1249L complex10        | 39517 |      | I-ΔD2-D4         | √  |    |    |    | √  | √  | √      |     |
| ASFV RNA polymerase-M1249L complex25        | 39536 |      | I-ΔD1-D4         |    |    |    |    | √  | √  | √      |     |
| ASFV RNA polymerase-M1249L complex 9        | 39515 |      | I-ΔD2-D5         | √  |    |    |    |    | √  | √      |     |
| ASFV RNA polymerase-M1249L complex2         | 39505 | 8YQT | I-ΔD1-D3         |    |    |    | √  | √  | √  | √      |     |
| ASFV RNA polymerase-DNA complex             | 39511 | 8YQZ |                  |    |    |    |    |    |    |        | √   |
| ASFV RNA polymerase-M1249L complex4         | 39509 | 8YQX |                  | √  |    |    |    |    |    |        |     |
| ASFV RNA polymerase-M1249L complex3         | 39508 | 8YQW |                  | √  |    |    | √  | √  | √  | √      |     |

|                                     |       |      |  |   |   |  |   |   |   |   |  |
|-------------------------------------|-------|------|--|---|---|--|---|---|---|---|--|
| ASFV RNA polymerase core            | 39507 | 8YQV |  |   |   |  |   |   |   |   |  |
| ASFV RNA polymerase-M1249L complex1 | 39506 | 8YQU |  | √ | √ |  | √ | √ | √ | √ |  |
