# Supplementary material for: Transcription regulation of African swine fever virus: dual role of M1249L
Source: PubMed Central journal article supplement — Nat Commun. 2024 Nov 20;15:10058. doi: 10.1038/s41467-024-54461-1 (PMC11579359; doi:10.1038/s41467-024-54461-1), 2024-11-20
Supplement: 41467_2024_54461_MOESM3_ESM.pdf [file 41467_2024_54461_MOESM3_ESM.pdf]

## Reporting Summary

Nature Portfolio wishes to improve the reproducibility of the work that we publish. This form provides structure for consistency and transparency in reporting. For further information on Nature Portfolio policies, see our [Editorial Policies](#) and the [Editorial Policy Checklist](#).

### Statistics

For all statistical analyses, confirm that the following items are present in the figure legend, table legend, main text, or Methods section.

n/a Confirmed

- The exact sample size ( $n$ ) for each experimental group/condition, given as a discrete number and unit of measurement
- A statement on whether measurements were taken from distinct samples or whether the same sample was measured repeatedly
- The statistical test(s) used AND whether they are one- or two-sided  
*Only common tests should be described solely by name; describe more complex techniques in the Methods section.*
- A description of all covariates tested
- A description of any assumptions or corrections, such as tests of normality and adjustment for multiple comparisons
- A full description of the statistical parameters including central tendency (e.g. means) or other basic estimates (e.g. regression coefficient) AND variation (e.g. standard deviation) or associated estimates of uncertainty (e.g. confidence intervals)
- For null hypothesis testing, the test statistic (e.g.  $F$ ,  $t$ ,  $r$ ) with confidence intervals, effect sizes, degrees of freedom and  $P$  value noted  
*Give  $P$  values as exact values whenever suitable.*
- For Bayesian analysis, information on the choice of priors and Markov chain Monte Carlo settings
- For hierarchical and complex designs, identification of the appropriate level for tests and full reporting of outcomes
- Estimates of effect sizes (e.g. Cohen's  $d$ , Pearson's  $r$ ), indicating how they were calculated

*Our web collection on [statistics for biologists](#) contains articles on many of the points above.*

### Software and code

Policy information about [availability of computer code](#)

Data collection

Data analysis

For manuscripts utilizing custom algorithms or software that are central to the research but not yet described in published literature, software must be made available to editors and reviewers. We strongly encourage code deposition in a community repository (e.g. GitHub). See the Nature Portfolio [guidelines for submitting code & software](#) for further information.

### Data

Policy information about [availability of data](#)

All manuscripts must include a [data availability statement](#). This statement should provide the following information, where applicable:

- Accession codes, unique identifiers, or web links for publicly available datasets
- A description of any restrictions on data availability
- For clinical datasets or third party data, please ensure that the statement adheres to our [policy](#)

The cryo-EM maps and coordinates have been deposited to the Electron Microscopy Data Bank (EMDB) and Protein Data Bank (PDB). The transcribing complexes include ASFV RNA polymerase core (EMD-39507, PDB ID 8YQV), ASFV RNA polymerase-M1249L complex1 (EMD-39506, PDB ID 8YQU), ASFV RNA polymerase-M1249L complex2 (EMD-39505, PDB ID 8YQT), ASFV RNA polymerase-M1249L complex3 (EMD-39508, PDB ID 8YQW), ASFV RNA polymerase-M1249L complex4 (EMD-39509, PDB ID 8YQX), ASFV RNA polymerase-M1249L complex complete (EMD-39510, PDB ID 8YQY), ASFV RNA polymerase-M1249L-DNA complex

(EMD-39511, PDB ID 8YQZ), ASFV RNA polymerase-M1249L complex5 (EMD-39514), ASFV RNA polymerase-M1249L complex6 (EMD-39512), ASFV RNA polymerase-M1249L complex7 (EMD-39513), ASFV RNA polymerase-M1249L complex8 (EMD-39516), ASFV RNA polymerase-M1249L complex9 (EMD-39515), ASFV RNA polymerase-M1249L complex10 (EMD-39517), ASFV RNA polymerase-M1249L complex11 (EMD-39518), ASFV RNA polymerase-M1249L complex12 (EMD-39519), ASFV RNA polymerase-M1249L complex13 (EMD-39521), ASFV RNA polymerase-M1249L complex14 (EMD-39520), ASFV RNA polymerase-M1249L complex15 (EMD-39522), ASFV RNA polymerase-M1249L complex16 (EMD-39523), ASFV RNA polymerase-M1249L complex17 (EMD-39524), ASFV RNA polymerase-M1249L complex18 (EMD-39525), ASFV RNA polymerase-M1249L complex19 (EMD-39526), ASFV RNA polymerase-M1249L complex20 (EMD-39527), ASFV RNA polymerase-M1249L complex21 (EMD-39528), ASFV RNA polymerase-M1249L complex22 (EMD-39530), ASFV RNA polymerase-M1249L complex23 (EMD-39531), ASFV RNA polymerase-M1249L complex24 (EMD-39529), and ASFV RNA polymerase-M1249L complex25 (EMD-39536). The raw sequencing data reported in this paper were submitted to Genome Sequence Archive (GSA) of National Genomics Data Center (<http://bigd.big.ac.cn>, Bioproject number: PRJCA003613).

## Research involving human participants, their data, or biological material

Policy information about studies with [human participants or human data](#). See also policy information about [sex, gender \(identity/presentation\), and sexual orientation](#) and [race, ethnicity and racism](#).

|                                                                    |                                               |
|--------------------------------------------------------------------|-----------------------------------------------|
| Reporting on sex and gender                                        | N/A                                           |
| Reporting on race, ethnicity, or other socially relevant groupings | N/A                                           |
| Population characteristics                                         | N/A                                           |
| Recruitment                                                        | N/A                                           |
| Ethics oversight                                                   | the Ministry of Agriculture and Rural Affairs |

Note that full information on the approval of the study protocol must also be provided in the manuscript.

## Field-specific reporting

Please select the one below that is the best fit for your research. If you are not sure, read the appropriate sections before making your selection.

Life sciences       Behavioural & social sciences       Ecological, evolutionary & environmental sciences

For a reference copy of the document with all sections, see [nature.com/documents/nr-reporting-summary-flat.pdf](https://www.nature.com/documents/nr-reporting-summary-flat.pdf)

## Life sciences study design

All studies must disclose on these points even when the disclosure is negative.

|                 |                                                                                                                                                                                                                 |
|-----------------|-----------------------------------------------------------------------------------------------------------------------------------------------------------------------------------------------------------------|
| Sample size     | For the cryo-EM analysis, the number of micrographs is determined by the available microscope time. The sample size of cell-based assays was performed three times, which is sufficient for statistic analysis. |
| Data exclusions | No data were excluded from analyses.                                                                                                                                                                            |
| Replication     | Sample preparation-related experiments including protein purification and enzymatic assays were reproduced at least three times independently. All attempts at replication were successful.                     |
| Randomization   | Randomization is not relevant to cryo-EM and other experiments, because the sample were not allocated into experimental groups during data acquisition and analysis.                                            |
| Blinding        | Blinding is not relevant to this study. The parameters for biochemistry, cryo-EM, and any other experiments in this study did not require subjective assessments of the treatments.                             |

## Reporting for specific materials, systems and methods

We require information from authors about some types of materials, experimental systems and methods used in many studies. Here, indicate whether each material, system or method listed is relevant to your study. If you are not sure if a list item applies to your research, read the appropriate section before selecting a response.

## Materials &amp; experimental systems

## Methods

- n/a  Involved in the study
- Antibodies
- Eukaryotic cell lines
- Palaeontology and archaeology
- Animals and other organisms
- Clinical data
- Dual use research of concern
- Plants

- n/a  Involved in the study
- ChIP-seq
- Flow cytometry
- MRI-based neuroimaging

## Antibodies

- Antibodies used
- Validation

## Eukaryotic cell lines

Policy information about [cell lines and Sex and Gender in Research](#)

- Cell line source(s)
- Authentication
- Mycoplasma contamination
- Commonly misidentified lines (See [ICLAC](#) register)

## Animals and other research organisms

Policy information about [studies involving animals](#); [ARRIVE guidelines](#) recommended for reporting animal research, and [Sex and Gender in Research](#)

- Laboratory animals
- Wild animals
- Reporting on sex
- Field-collected samples
- Ethics oversight

Note that full information on the approval of the study protocol must also be provided in the manuscript.

## Plants

- Seed stocks
- Novel plant genotypes
- Authentication
